# Supplementary material for: Sex Differences in Intestinal Microbiota and Their Association with Some Diseases in a Japanese Population Observed by Analysis Using a Large Dataset
Source: MDPI journal article supplement (doi:10.3390/biomedicines11020376), 2023-01-27
Supplement: s1 [file s1]

|                    |                                  |       |       |       |       |       |       |
|--------------------|----------------------------------|-------|-------|-------|-------|-------|-------|
| Taxa (genus level) | <i>Acidaminococcus</i>           | -0.30 | -0.20 | 0.09  | -0.04 | -0.08 | -0.10 |
|                    | <i>Agathobacter</i>              | 0.27  | 0.16  | 0.49  | 0.30  | 0.07  | 0.08  |
|                    | <i>Agathobaculum</i>             | 0.09  | -0.01 | -0.06 | -0.17 | 0.21  | 0.08  |
|                    | <i>Akkermansia</i>               | -0.07 | 0.11  | 0.07  | -0.31 | 0.16  | 0.01  |
|                    | <i>Alistipes</i>                 | -0.20 | 0.04  | 0.17  | -0.06 | 0.16  | 0.00  |
|                    | <i>Anaeromassilibacillus</i>     | -0.27 | 0.09  | -0.10 | -0.01 | 0.01  | -0.10 |
|                    | <i>Bacteroides</i>               | 0.02  | 0.33  | 0.26  | -0.33 | -0.03 | -0.04 |
|                    | <i>Bifidobacterium</i>           | -0.02 | -0.21 | -0.07 | 0.09  | 0.05  | -0.07 |
|                    | <i>Butyricicoccus</i>            | -0.02 | 0.10  | 0.04  | -0.02 | -0.23 | 0.12  |
|                    | <i>Butyricimonas</i>             | -0.39 | -0.02 | 0.06  | 0.04  | 0.16  | 0.09  |
|                    | <i>Clostridium_IV</i>            | 0.02  | -0.20 | 0.05  | -0.00 | 0.15  | -0.21 |
|                    | <i>Clostridium_sensu_stricto</i> | 0.48  | -0.04 | 0.00  | 0.03  | -0.00 | -0.01 |
|                    | <i>Clostridium_XIVa</i>          | 0.18  | -0.12 | 0.08  | -0.07 | -0.29 | 0.13  |
|                    | <i>Clostridium_XVIII</i>         | 0.06  | 0.27  | -0.06 | -0.14 | -0.13 | -0.18 |
|                    | <i>Coprobacter</i>               | 0.02  | -0.21 | 0.14  | 0.17  | -0.06 | 0.15  |
|                    | <i>Coprococcus</i>               | 0.19  | 0.07  | -0.12 | 0.04  | 0.27  | 0.21  |
|                    | <i>Dialister</i>                 | -0.13 | -0.12 | 0.05  | 0.35  | 0.25  | 0.22  |
|                    | <i>Dorea</i>                     | -0.02 | -0.06 | 0.06  | 0.07  | 0.24  | -0.02 |
|                    | <i>Dysosmobacter</i>             | -0.31 | -0.12 | -0.20 | 0.06  | -0.32 | -0.20 |
|                    | <i>Eggerthella</i>               | -0.08 | 0.01  | -0.16 | -0.03 | -0.13 | -0.21 |
|                    | <i>Enterocloster</i>             | 0.00  | -0.14 | 0.02  | -0.03 | -0.33 | -0.06 |
|                    | <i>Enterococcus</i>              | 0.15  | 0.10  | -0.36 | -0.04 | -0.00 | 0.01  |
|                    | <i>Faecalibacillus</i>           | 0.27  | 0.03  | 0.04  | 0.06  | 0.29  | 0.19  |
|                    | <i>Flavonifractor</i>            | 0.00  | -0.07 | -0.02 | -0.10 | -0.34 | -0.16 |
|                    | <i>Frisingicoccus</i>            | -0.16 | -0.25 | 0.05  | -0.02 | 0.07  | 0.00  |
|                    | <i>Fusobacterium</i>             | 0.34  | 0.14  | 0.06  | -0.15 | -0.21 | -0.03 |
|                    | <i>Intestinimonas</i>            | 0.10  | -0.05 | -0.02 | -0.13 | -0.20 | 0.08  |
|                    | <i>Lachnospira</i>               | 0.21  | -0.11 | 0.05  | 0.03  | 0.24  | 0.12  |
|                    | <i>Lactaseibacillus</i>          | -0.19 | 0.07  | -0.06 | -0.09 | -0.03 | -0.20 |
|                    | <i>Lactobacillus</i>             | -0.16 | -0.06 | -0.11 | -0.27 | -0.19 | -0.26 |
|                    | <i>Ligilactobacillus</i>         | -0.08 | -0.07 | 0.05  | -0.13 | -0.38 | -0.04 |
|                    | <i>Limosilactobacillus</i>       | -0.07 | -0.11 | 0.04  | -0.21 | -0.15 | -0.29 |
|                    | <i>Mediterraneibacter</i>        | -0.13 | -0.41 | 0.17  | 0.23  | 0.02  | 0.16  |
|                    | <i>Megasphaera</i>               | -0.12 | -0.06 | -0.42 | 0.04  | -0.28 | 0.10  |
|                    | <i>Negativibacillus</i>          | 0.34  | -0.21 | -0.09 | 0.07  | -0.27 | -0.13 |
|                    | <i>Neglecta</i>                  | -0.46 | 0.08  | -0.09 | 0.19  | 0.07  | -0.01 |
|                    | <i>Odoribacter</i>               | -0.12 | -0.26 | 0.15  | 0.10  | 0.09  | 0.20  |
|                    | <i>Olsenella</i>                 | -0.22 | -0.14 | -0.00 | -0.05 | 0.03  | 0.02  |
|                    | <i>Oscillibacter</i>             | 0.23  | 0.08  | -0.12 | 0.04  | 0.29  | 0.10  |
|                    | <i>Paraprevotella</i>            | -0.50 | -0.36 | -0.03 | 0.09  | 0.09  | -0.21 |
|                    | <i>Parasutterella</i>            | 0.07  | -0.22 | -0.06 | -0.03 | -0.07 | -0.15 |
|                    | <i>Phascolarctobacterium</i>     | 0.06  | 0.18  | -0.05 | -0.19 | 0.03  | -0.26 |
|                    | <i>Prevotella</i>                | -0.26 | -0.32 | -0.06 | 0.12  | -0.04 | -0.03 |
|                    | <i>Prevotellamassilia</i>        | 0.00  | -0.09 | -0.27 | -0.01 | -0.07 | 0.08  |
|                    | <i>Romboutsia</i>                | 0.24  | 0.17  | 0.29  | 0.17  | 0.09  | 0.07  |
|                    | <i>Roseburia</i>                 | 0.17  | 0.09  | 0.08  | -0.12 | 0.35  | 0.01  |
|                    | <i>Ruminococcus</i>              | -0.25 | -0.06 | -0.05 | -0.03 | 0.28  | 0.05  |
|                    | <i>Ruminococcus2</i>             | -0.04 | 0.02  | 0.36  | 0.14  | -0.36 | -0.07 |
|                    | <i>Ruthenibacterium</i>          | -0.04 | -0.04 | 0.21  | -0.15 | -0.25 | -0.03 |
|                    | <i>Streptococcus</i>             | -0.44 | -0.06 | -0.26 | -0.39 | -0.34 | -0.61 |
|                    | <i>Turicibacter</i>              | 0.08  | -0.04 | 0.13  | 0.05  | 0.38  | 0.02  |
|                    | <i>Veillonella</i>               | 0.14  | 0.12  | -0.19 | -0.24 | -0.18 | -0.16 |

50s\_Male 60s\_Male 70s\_Male  
50s\_Female 60s\_Female 70s\_Female  
Age group and sex

Supplementary Figure S1. The values of ALDEx2 effect size obtained by comparing the gastritis disease-affected and disease-free Japanese control groups. The comparisons were performed considering age and sex. Negative values of effect size indicate taxa that are more abundant in the disease-affected group than in the control group, and positive values indicate taxa that are less abundant. The values of effect size less than -0.2 are indicated with pink, and the values greater than 0.2 are indicated with light blue.

| Taxa (genus level) |                                  | 50s_Male          | 50s_Female | 60s_Male | 60s_Female |
|--------------------|----------------------------------|-------------------|------------|----------|------------|
|                    |                                  |                   |            |          |            |
|                    |                                  |                   |            |          |            |
|                    |                                  |                   |            |          |            |
|                    | <i>Agathobacter</i>              | -0.07             | 0.27       | 0.11     | 0.26       |
|                    | <i>Agathobaculum</i>             | -0.24             | -0.15      | -0.16    | 0.01       |
|                    | <i>Anaeromassilibacillus</i>     | 0.37              | -0.30      | 0.10     | -0.21      |
|                    | <i>Anaerostipes</i>              | -0.07             | -0.11      | 0.23     | 0.07       |
|                    | <i>Anaerotruncus</i>             | -0.32             | -0.20      | 0.06     | 0.01       |
|                    | <i>Bacteroides</i>               | -0.30             | -0.00      | 0.11     | -0.18      |
|                    | <i>Blautia</i>                   | -0.24             | -0.38      | 0.13     | -0.04      |
|                    | <i>Butyricimonas</i>             | 0.01              | 0.42       | -0.12    | -0.03      |
|                    | <i>Clostridium_sensu_stricto</i> | -0.33             | 0.10       | -0.07    | -0.05      |
|                    | <i>Clostridium_XIVa</i>          | -0.48             | -0.25      | -0.10    | -0.26      |
|                    | <i>Clostridium_XIVb</i>          | 0.14              | 0.11       | -0.17    | 0.26       |
|                    | <i>Coprobacter</i>               | 0.63              | -0.03      | -0.03    | 0.32       |
|                    | <i>Coprococcus</i>               | 0.05              | 0.12       | -0.26    | 0.27       |
|                    | <i>Dialister</i>                 | 0.02              | 0.31       | -0.02    | -0.07      |
|                    | <i>Dorea</i>                     | -0.27             | 0.05       | 0.07     | 0.10       |
|                    | <i>Dysosmobacter</i>             | 0.04              | -0.32      | 0.19     | -0.11      |
|                    | <i>Eggerthella</i>               | -0.09             | -0.09      | 0.15     | -0.44      |
|                    | <i>Eisenbergiella</i>            | 0.06              | -0.32      | 0.05     | 0.10       |
|                    | <i>Enterocloster</i>             | -0.29             | -0.15      | 0.16     | -0.13      |
|                    | <i>Faecalibacillus</i>           | 0.21              | 0.20       | 0.04     | 0.08       |
|                    | <i>Faecalibacterium</i>          | 0.06              | 0.12       | -0.03    | 0.24       |
|                    | <i>Faecalimonas</i>              | 0.06              | -0.27      | 0.06     | -0.24      |
|                    | <i>Flavonifractor</i>            | -0.31             | -0.45      | -0.11    | -0.38      |
|                    | <i>Fournierella</i>              | 0.08              | -0.23      | 0.06     | -0.10      |
|                    | <i>Fusobacterium</i>             | 0.06              | -0.02      | 0.09     | -0.34      |
|                    | <i>Holdemania</i>                | -0.10             | -0.24      | 0.16     | -0.04      |
|                    | <i>Hungatella</i>                | -0.04             | -0.23      | -0.04    | -0.11      |
|                    | <i>Intestinibacter</i>           | -0.54             | -0.38      | 0.03     | -0.18      |
|                    | <i>Lawsonibacter</i>             | 0.19              | -0.21      | 0.22     | 0.12       |
|                    | <i>Ligilactobacillus</i>         | 0.06              | -0.09      | -0.26    | -0.03      |
|                    | <i>Massilimicrobiota</i>         | 0.18              | -0.22      | 0.08     | 0.14       |
|                    | <i>Mediterraneibacter</i>        | -0.26             | 0.06       | 0.13     | 0.23       |
|                    | <i>Megamonas</i>                 | 0.46              | -0.08      | 0.05     | 0.08       |
|                    | <i>Neglecta</i>                  | -0.01             | -0.17      | -0.23    | -0.14      |
|                    | <i>Odoribacter</i>               | 0.19              | 0.25       | 0.05     | 0.03       |
|                    | <i>Oscillibacter</i>             | 0.02              | 0.27       | -0.07    | 0.44       |
|                    | <i>Parabacteroides</i>           | -0.22             | -0.02      | 0.18     | -0.00      |
|                    | <i>Paraprevotella</i>            | 0.30              | 0.07       | -0.12    | 0.17       |
|                    | <i>Prevotella</i>                | 0.18              | 0.03       | 0.23     | 0.30       |
|                    | <i>Romboutsia</i>                | 0.22              | 0.08       | 0.12     | -0.10      |
|                    | <i>Roseburia</i>                 | 0.10              | 0.35       | -0.01    | 0.36       |
|                    | <i>Ruminococcus</i>              | -0.10             | 0.30       | 0.06     | 0.06       |
|                    | <i>Ruthenibacterium</i>          | -0.13             | 0.09       | 0.15     | -0.26      |
|                    | <i>Sellimonas</i>                | -0.11             | -0.31      | 0.07     | 0.09       |
|                    | <i>Streptococcus</i>             | 0.27              | -0.09      | -0.14    | -0.13      |
|                    | <i>Terrisporobacter</i>          | -0.22             | 0.00       | -0.09    | -0.04      |
|                    | <i>Turicibacter</i>              | -0.11             | -0.00      | -0.02    | -0.25      |
|                    | <i>Veillonella</i>               | -0.23             | -0.07      | -0.11    | 0.11       |
|                    |                                  | 50s_Male          | 50s_Female | 60s_Male | 60s_Female |
|                    |                                  | Age group and sex |            |          |            |

Supplementary Figure S2. The values of ALDEx2 effect size obtained by comparing the kidney disease-affected and disease-free Japanese control groups. The comparisons were performed considering age and sex. Negative values of effect size indicate taxa that are more abundant in the disease-affected group than in the control group, and positive values indicate taxa that are less abundant. The values of effect size less than -0.2 are indicated with pink, and the values greater than 0.2 are indicated with light blue.

|                    |                                  |                   |            |            |            |       |       |       |       |
|--------------------|----------------------------------|-------------------|------------|------------|------------|-------|-------|-------|-------|
| Taxa (genus level) | <i>Acidaminococcus</i>           | 0.35              | 0.03       | 0.01       | 0.03       | -0.13 | 0.01  | -0.18 | 0.01  |
|                    | <i>Agathobacter</i>              | 0.05              | 0.32       | -0.17      | -0.00      | 0.00  | 0.10  | 0.15  | 0.06  |
|                    | <i>Agathobaculum</i>             | 0.44              | -0.05      | -0.04      | 0.11       | 0.22  | 0.14  | 0.22  | 0.20  |
|                    | <i>Alistipes</i>                 | 0.49              | 0.05       | -0.07      | 0.04       | -0.05 | 0.24  | 0.08  | 0.18  |
|                    | <i>Allisonella</i>               | 0.21              | 0.00       | -0.05      | 0.03       | 0.01  | 0.05  | -0.01 | 0.04  |
|                    | <i>Amedibacterium</i>            | -0.24             | -0.08      | 0.04       | -0.01      | -0.03 | -0.05 | -0.09 | -0.01 |
|                    | <i>Anaerobutyricum</i>           | 0.07              | 0.18       | -0.07      | 0.04       | -0.07 | -0.01 | 0.40  | 0.14  |
|                    | <i>Anaeromassilibacillus</i>     | -0.14             | -0.10      | -0.09      | 0.02       | 0.10  | 0.20  | -0.28 | -0.02 |
|                    | <i>Anaerostipes</i>              | -0.20             | 0.23       | -0.13      | 0.35       | 0.43  | -0.14 | -0.17 | 0.25  |
|                    | <i>Barnesiella</i>               | 0.07              | 0.06       | 0.09       | 0.11       | 0.10  | 0.28  | 0.02  | 0.10  |
|                    | <i>Bifidobacterium</i>           | 0.06              | 0.14       | -0.06      | 0.04       | 0.01  | 0.01  | -0.36 | -0.08 |
|                    | <i>Butyricoccus</i>              | -0.23             | -0.06      | 0.02       | 0.01       | -0.02 | 0.04  | -0.23 | 0.11  |
|                    | <i>Butyricimonas</i>             | 0.32              | 0.23       | 0.04       | -0.09      | -0.04 | 0.18  | -0.02 | 0.28  |
|                    | <i>Clostridium_IV</i>            | 0.07              | 0.20       | -0.14      | 0.12       | -0.02 | 0.14  | -0.12 | 0.02  |
|                    | <i>Clostridium_sensu_stricto</i> | 0.11              | 0.02       | -0.06      | 0.05       | 0.00  | -0.17 | 0.39  | 0.20  |
|                    | <i>Clostridium_XIVa</i>          | -0.21             | -0.12      | 0.01       | -0.21      | -0.05 | -0.03 | -0.24 | -0.12 |
|                    | <i>Clostridium_XIVb</i>          | -0.21             | 0.09       | 0.09       | 0.08       | 0.03  | 0.14  | 0.11  | 0.03  |
|                    | <i>Clostridium_XVIII</i>         | 0.03              | -0.03      | 0.16       | 0.04       | -0.13 | -0.17 | -0.23 | -0.25 |
|                    | <i>Collinsella</i>               | 0.49              | 0.10       | -0.08      | 0.16       | -0.14 | 0.27  | 0.36  | 0.16  |
|                    | <i>Coprobacillus</i>             | -0.22             | -0.17      | -0.01      | 0.05       | 0.03  | 0.03  | 0.08  | -0.17 |
|                    | <i>Coprobacter</i>               | 0.27              | 0.19       | 0.10       | 0.08       | -0.18 | 0.43  | 0.29  | 0.04  |
|                    | <i>Coprococcus</i>               | 0.15              | 0.14       | 0.14       | -0.03      | 0.21  | 0.11  | 0.28  | 0.27  |
|                    | <i>Dialister</i>                 | 0.32              | 0.13       | 0.06       | 0.02       | -0.23 | -0.13 | 0.14  | 0.14  |
|                    | <i>Dorea</i>                     | 0.12              | 0.24       | -0.05      | 0.24       | -0.04 | -0.01 | 0.29  | 0.22  |
|                    | <i>Duodenibacillus</i>           | -0.33             | -0.11      | -0.11      | -0.07      | -0.05 | 0.10  | -0.01 | 0.03  |
|                    | <i>Dysosmobacter</i>             | 0.37              | 0.08       | -0.12      | -0.04      | -0.18 | 0.11  | -0.03 | -0.14 |
|                    | <i>Eggerthella</i>               | -0.13             | 0.10       | 0.04       | 0.04       | -0.06 | -0.15 | -0.39 | -0.12 |
|                    | <i>Enterocloster</i>             | -0.35             | -0.24      | -0.09      | -0.14      | 0.06  | -0.17 | -0.07 | -0.38 |
|                    | <i>Enterococcus</i>              | -0.17             | -0.25      | 0.02       | -0.10      | -0.05 | -0.27 | -0.10 | -0.14 |
|                    | <i>Erysipelatoclostridium</i>    | -0.29             | -0.20      | -0.04      | -0.21      | 0.01  | -0.31 | -0.50 | -0.21 |
|                    | <i>Faecalibacillus</i>           | 0.46              | 0.19       | 0.01       | 0.07       | 0.39  | 0.11  | 0.28  | 0.42  |
|                    | <i>Faecalibacterium</i>          | 0.38              | 0.25       | 0.14       | 0.07       | 0.11  | 0.07  | 0.02  | 0.14  |
|                    | <i>Flavonifractor</i>            | -0.10             | -0.05      | -0.08      | -0.10      | -0.12 | -0.11 | -0.49 | -0.44 |
|                    | <i>Frisingicoccus</i>            | -0.02             | -0.06      | -0.07      | 0.02       | -0.01 | 0.03  | -0.21 | -0.02 |
|                    | <i>Fusicatenibacter</i>          | -0.06             | 0.36       | -0.08      | 0.20       | 0.11  | -0.01 | -0.02 | 0.02  |
|                    | <i>Fusobacterium</i>             | -0.27             | -0.26      | 0.01       | -0.11      | 0.25  | -0.22 | 0.00  | -0.03 |
|                    | <i>Holdemanella</i>              | 0.22              | -0.01      | -0.02      | -0.00      | -0.11 | 0.06  | 0.20  | 0.11  |
|                    | <i>Lachnospira</i>               | -0.13             | 0.37       | -0.05      | 0.09       | 0.03  | 0.01  | 0.04  | 0.41  |
|                    | <i>Lactobacillus</i>             | -0.17             | -0.18      | 0.03       | -0.09      | 0.08  | -0.13 | -0.25 | -0.39 |
|                    | <i>Lawsonibacter</i>             | 0.21              | 0.14       | 0.06       | -0.15      | 0.06  | 0.04  | -0.24 | -0.08 |
|                    | <i>Limosilactobacillus</i>       | -0.12             | -0.18      | -0.07      | -0.09      | -0.18 | -0.06 | -0.29 | -0.28 |
|                    | <i>Massilimicrobiota</i>         | -0.15             | -0.00      | 0.10       | 0.02       | 0.08  | -0.30 | -0.27 | -0.26 |
|                    | <i>Mediterraneibacter</i>        | 0.05              | 0.12       | -0.27      | 0.03       | 0.06  | 0.09  | 0.20  | 0.23  |
|                    | <i>Megamonas</i>                 | 0.28              | -0.00      | 0.00       | 0.05       | -0.07 | 0.02  | 0.16  | 0.05  |
|                    | <i>Megasphaera</i>               | -0.08             | 0.01       | -0.07      | -0.01      | -0.30 | 0.08  | -0.06 | -0.14 |
|                    | <i>Merdimonas</i>                | -0.09             | -0.06      | -0.01      | -0.04      | -0.09 | -0.02 | -0.41 | -0.05 |
|                    | <i>Mogibacterium</i>             | 0.03              | -0.05      | 0.05       | -0.01      | -0.33 | 0.01  | 0.01  | -0.00 |
|                    | <i>Negativibacillus</i>          | 0.31              | 0.14       | 0.04       | -0.15      | -0.09 | 0.17  | -0.01 | -0.07 |
|                    | <i>Neglecta</i>                  | 0.22              | 0.18       | -0.07      | 0.18       | -0.14 | 0.10  | 0.00  | 0.08  |
|                    | <i>Odoribacter</i>               | 0.61              | 0.15       | -0.09      | 0.20       | 0.18  | 0.29  | 0.16  | 0.26  |
|                    | <i>Oscillibacter</i>             | 0.13              | 0.15       | 0.19       | -0.05      | 0.00  | 0.41  | 0.36  | 0.60  |
|                    | <i>Parabacteroides</i>           | 0.13              | 0.08       | -0.18      | -0.02      | -0.13 | 0.07  | 0.25  | -0.12 |
|                    | <i>Phascolarctobacterium</i>     | -0.25             | -0.10      | -0.04      | 0.02       | 0.26  | 0.04  | 0.01  | -0.05 |
|                    | <i>Prevotella</i>                | 0.56              | -0.06      | 0.05       | 0.06       | -0.00 | -0.05 | 0.13  | 0.14  |
|                    | <i>Roseburia</i>                 | 0.22              | 0.45       | 0.16       | 0.05       | -0.09 | -0.04 | 0.33  | 0.02  |
|                    | <i>Ruminococcus</i>              | 0.48              | 0.07       | -0.02      | 0.10       | -0.16 | 0.25  | 0.32  | 0.30  |
|                    | <i>Sellimonas</i>                | -0.17             | 0.05       | -0.22      | -0.09      | -0.02 | -0.06 | -0.15 | -0.07 |
|                    | <i>Streptococcus</i>             | -0.37             | -0.15      | -0.03      | -0.26      | -0.10 | -0.38 | -0.54 | -0.23 |
|                    | <i>Turicibacter</i>              | 0.19              | 0.20       | 0.18       | 0.11       | 0.12  | -0.11 | 0.28  | 0.16  |
|                    | <i>Veillonella</i>               | -0.37             | -0.06      | 0.00       | -0.01      | 0.14  | -0.38 | -0.43 | -0.27 |
|                    |                                  | 40s_Male          | 50s_Male   | 60s_Male   | 70s_Male   |       |       |       |       |
|                    |                                  | 40s_Female        | 50s_Female | 60s_Female | 70s_Female |       |       |       |       |
|                    |                                  | Age group and sex |            |            |            |       |       |       |       |

Supplementary Figure S3. The values of ALDEx2 effect size obtained by comparing the liver disease-affected and disease-free Japanese control groups. The comparisons were performed considering age and sex. Negative values of effect size indicate taxa that are more abundant in the disease-affected group than in the control group, and positive values indicate taxa that are less abundant. The values of effect size less than -0.2 are indicated with pink, and the values greater than 0.2 are indicated with light blue.

|                    |                                  |                   |            |          |            |          |            |
|--------------------|----------------------------------|-------------------|------------|----------|------------|----------|------------|
| Taxa (genus level) | <i>Adlercreutzia</i>             | 0.15              | 0.22       | 0.04     | 0.05       | 0.12     | -0.13      |
|                    | <i>Akkermansia</i>               | 0.14              | -0.01      | 0.09     | -0.09      | -0.21    | -0.03      |
|                    | <i>Anaeromassilibacillus</i>     | 0.23              | -0.05      | -0.11    | -0.03      | -0.04    | -0.10      |
|                    | <i>Anaerofignum</i>              | 0.26              | -0.29      | 0.05     | -0.05      | 0.07     | -0.09      |
|                    | <i>Bacteroides</i>               | 0.22              | -0.07      | -0.08    | -0.18      | -0.02    | -0.07      |
|                    | <i>Barnesiella</i>               | 0.12              | 0.24       | 0.16     | 0.20       | -0.02    | 0.00       |
|                    | <i>Bifidobacterium</i>           | 0.23              | -0.05      | 0.06     | 0.07       | 0.11     | 0.05       |
|                    | <i>Blautia</i>                   | 0.11              | 0.17       | -0.27    | -0.11      | 0.01     | -0.21      |
|                    | <i>Butyrivimonas</i>             | -0.31             | -0.25      | 0.01     | 0.11       | -0.08    | -0.10      |
|                    | <i>Clostridium_IV</i>            | -0.25             | -0.19      | -0.20    | 0.05       | -0.08    | -0.03      |
|                    | <i>Clostridium_sensu_stricto</i> | -0.09             | -0.10      | -0.17    | -0.10      | 0.01     | 0.34       |
|                    | <i>Clostridium_XIVa</i>          | 0.10              | -0.24      | 0.02     | 0.05       | 0.00     | 0.09       |
|                    | <i>Clostridium_XVIII</i>         | 0.24              | -0.10      | 0.00     | -0.08      | 0.00     | -0.14      |
|                    | <i>Coprobacter</i>               | -0.14             | 0.31       | 0.14     | 0.18       | -0.02    | -0.06      |
|                    | <i>Coproccoccus</i>              | -0.44             | 0.27       | 0.07     | 0.13       | 0.07     | 0.19       |
|                    | <i>Dialister</i>                 | 0.03              | 0.48       | -0.00    | -0.03      | 0.17     | 0.07       |
|                    | <i>Dorea</i>                     | -0.15             | 0.19       | 0.02     | 0.10       | 0.22     | -0.21      |
|                    | <i>Dysosmobacter</i>             | 0.09              | -0.18      | -0.15    | -0.01      | -0.13    | -0.24      |
|                    | <i>Enterocloster</i>             | 0.24              | -0.50      | -0.21    | -0.12      | -0.36    | -0.23      |
|                    | <i>Erysipelatoclostridium</i>    | 0.30              | -0.25      | -0.08    | -0.22      | -0.13    | -0.07      |
|                    | <i>Faecalibacillus</i>           | -0.28             | 0.08       | 0.10     | 0.09       | 0.16     | 0.10       |
|                    | <i>Faecalimonas</i>              | 0.22              | -0.24      | -0.02    | -0.18      | -0.04    | -0.11      |
|                    | <i>Flavonifractor</i>            | 0.40              | -0.27      | -0.15    | -0.16      | -0.25    | -0.30      |
|                    | <i>Frisingicoccus</i>            | -0.01             | -0.20      | 0.01     | 0.01       | -0.12    | 0.02       |
|                    | <i>Fusobacterium</i>             | 0.07              | -0.47      | -0.12    | -0.23      | -0.15    | -0.01      |
|                    | <i>Holdemanella</i>              | -0.58             | 0.07       | 0.06     | 0.05       | -0.05    | 0.07       |
|                    | <i>Intestinimonas</i>            | 0.12              | -0.35      | 0.02     | 0.17       | -0.06    | 0.17       |
|                    | <i>Lawsonibacter</i>             | 0.20              | 0.19       | -0.04    | 0.02       | -0.06    | -0.06      |
|                    | <i>Limosilactobacillus</i>       | 0.05              | 0.08       | -0.19    | -0.04      | -0.12    | -0.22      |
|                    | <i>Massilimicrobiota</i>         | 0.29              | -0.21      | -0.01    | 0.08       | -0.03    | -0.07      |
|                    | <i>Mediterraneibacter</i>        | -0.30             | 0.14       | -0.07    | -0.02      | 0.08     | 0.04       |
|                    | <i>Mogibacterium</i>             | -0.30             | 0.06       | -0.05    | -0.07      | 0.01     | -0.00      |
|                    | <i>Negativibacillus</i>          | -0.25             | -0.15      | 0.13     | 0.00       | -0.05    | -0.12      |
|                    | <i>Neglecta</i>                  | -0.39             | 0.17       | -0.12    | -0.08      | 0.08     | 0.05       |
|                    | <i>Oscillibacter</i>             | -0.25             | 0.36       | 0.17     | 0.13       | 0.07     | 0.08       |
|                    | <i>Paraprevotella</i>            | -0.28             | 0.13       | 0.14     | 0.19       | -0.11    | -0.12      |
|                    | <i>Parasutterella</i>            | -0.05             | 0.27       | -0.07    | 0.06       | 0.02     | -0.03      |
|                    | <i>Phascolarctobacterium</i>     | 0.00              | -0.45      | -0.04    | 0.12       | -0.08    | -0.17      |
|                    | <i>Prevotella</i>                | -0.21             | 0.02       | 0.04     | -0.16      | 0.06     | -0.01      |
|                    | <i>Romboutsia</i>                | 0.01              | -0.22      | -0.00    | 0.11       | 0.10     | 0.07       |
|                    | <i>Roseburia</i>                 | 0.00              | -0.31      | -0.03    | 0.00       | 0.05     | 0.19       |
|                    | <i>Ruminococcus</i>              | -0.20             | 0.23       | -0.08    | 0.11       | 0.01     | 0.00       |
|                    | <i>Ruminococcus2</i>             | 0.05              | -0.34      | -0.10    | -0.19      | -0.12    | -0.26      |
|                    | <i>Ruthenibacterium</i>          | 0.08              | 0.03       | 0.01     | -0.21      | -0.23    | -0.21      |
|                    | <i>Streptococcus</i>             | -0.14             | -0.26      | -0.08    | -0.17      | -0.16    | -0.33      |
|                    | <i>Turicibacter</i>              | -0.36             | -0.03      | 0.04     | -0.06      | 0.09     | 0.32       |
|                    |                                  | 50s_Male          | 50s_Female | 60s_Male | 60s_Female | 70s_Male | 70s_Female |
|                    |                                  | Age group and sex |            |          |            |          |            |

Supplementary Figure S4. The values of ALDEx2 effect size obtained by comparing the arrhythmia disease-affected and disease-free Japanese control groups. The comparisons were performed considering age and sex. Negative values of effect size indicate taxa that are more abundant in the disease-affected group than in the control group, and positive values indicate taxa that are less abundant. The values of effect size less than -0.2 are indicated with pink, and the values greater than 0.2 are indicated with light blue.

|                    |                          |                   |          |            |            |
|--------------------|--------------------------|-------------------|----------|------------|------------|
| Taxa (genus level) | <i>Acidaminococcus</i>   | -0.27             | 0.12     | -0.02      | -0.04      |
|                    | <i>Agathobaculum</i>     | -0.04             | 0.07     | 0.02       | 0.26       |
|                    | <i>Alistipes</i>         | -0.23             | -0.02    | -0.09      | 0.03       |
|                    | <i>Anaerostipes</i>      | 0.20              | 0.19     | -0.20      | 0.06       |
|                    | <i>Anaerotignum</i>      | -0.11             | -0.30    | -0.06      | -0.14      |
|                    | <i>Clostridium_XVIII</i> | 0.08              | 0.20     | -0.16      | -0.14      |
|                    | <i>Dysosmobacter</i>     | -0.25             | -0.03    | -0.19      | -0.01      |
|                    | <i>Enterocloster</i>     | -0.07             | -0.11    | -0.22      | 0.13       |
|                    | <i>Faecalibacillus</i>   | 0.24              | 0.14     | 0.15       | -0.06      |
|                    | <i>Flavonifractor</i>    | -0.24             | -0.06    | -0.14      | -0.09      |
|                    | <i>Intestinibacter</i>   | 0.13              | 0.10     | 0.20       | -0.01      |
|                    | <i>Intestinimonas</i>    | 0.04              | 0.09     | -0.02      | -0.25      |
|                    | <i>Massilimicrobiota</i> | 0.03              | -0.29    | -0.15      | -0.13      |
|                    | <i>Negativibacillus</i>  | -0.32             | -0.10    | -0.16      | -0.12      |
|                    | <i>Odoribacter</i>       | -0.07             | 0.24     | -0.04      | 0.04       |
|                    | <i>Parabacteroides</i>   | -0.24             | -0.05    | -0.08      | -0.01      |
|                    | <i>Paraprevotella</i>    | 0.11              | 0.20     | -0.08      | -0.08      |
|                    | <i>Phocaeicola</i>       | -0.04             | 0.22     | 0.06       | 0.02       |
|                    | <i>Roseburia</i>         | 0.13              | 0.16     | 0.39       | -0.06      |
|                    | <i>Ruminococcus2</i>     | -0.04             | -0.26    | -0.10      | -0.03      |
|                    | <i>Ruthenibacterium</i>  | -0.25             | -0.34    | -0.17      | -0.01      |
|                    | <i>Senegalimassilia</i>  | -0.03             | 0.08     | 0.23       | -0.06      |
|                    | <i>Streptococcus</i>     | -0.34             | -0.16    | -0.25      | -0.32      |
|                    | <i>Turicibacter</i>      | 0.24              | 0.09     | 0.17       | 0.07       |
|                    |                          | 60s_Male          | 70s_Male | 60s_Female | 70s_Female |
|                    |                          | Age group and sex |          |            |            |

Supplementary Figure S5. The values of ALDEx2 effect size obtained by comparing the angina pectoris disease-affected and disease-free Japanese control groups. The comparisons were performed considering age and sex. Negative values of effect size indicate taxa that are more abundant in the disease-affected group than in the control group, and positive values indicate taxa that are less abundant. The values of effect size less than -0.2 are indicated with pink, and the values greater than 0.2 are indicated with light blue.

|                    |                               |                   |            |          |            |          |            |
|--------------------|-------------------------------|-------------------|------------|----------|------------|----------|------------|
| Taxa (genus level) | <i>Agathobacter</i>           | -0.08             | 0.12       | -0.00    | 0.03       | 0.26     | 0.63       |
|                    | <i>Bacteroides</i>            | -0.20             | -0.03      | -0.04    | 0.06       | -0.17    | -0.24      |
|                    | <i>Clostridium_XIVa</i>       | -0.04             | 0.06       | -0.11    | 0.09       | -0.05    | -0.25      |
|                    | <i>Clostridium_XIVb</i>       | 0.12              | 0.07       | 0.02     | 0.08       | 0.07     | 0.23       |
|                    | <i>Clostridium_XVIII</i>      | -0.04             | -0.05      | -0.18    | -0.14      | -0.26    | -0.22      |
|                    | <i>Coproccoccus</i>           | 0.01              | 0.21       | 0.06     | 0.14       | 0.12     | 0.24       |
|                    | <i>Eggerthella</i>            | -0.06             | 0.01       | -0.04    | 0.05       | -0.10    | -0.34      |
|                    | <i>Enterococcus</i>           | -0.01             | -0.04      | -0.13    | -0.13      | -0.09    | -0.27      |
|                    | <i>Erysipelatoclostridium</i> | -0.21             | -0.07      | -0.06    | 0.03       | -0.19    | -0.27      |
|                    | <i>Faecalibacillus</i>        | 0.11              | 0.17       | -0.06    | 0.00       | 0.03     | 0.21       |
|                    | <i>Flavonifractor</i>         | -0.03             | -0.05      | -0.14    | 0.04       | -0.14    | -0.37      |
|                    | <i>Fusobacterium</i>          | 0.04              | 0.13       | -0.07    | -0.03      | -0.21    | -0.02      |
|                    | <i>Holdemania</i>             | -0.08             | 0.01       | -0.02    | 0.02       | -0.02    | -0.23      |
|                    | <i>Intestinibacter</i>        | -0.04             | -0.22      | 0.06     | 0.04       | -0.01    | -0.24      |
|                    | <i>Intestinimonas</i>         | -0.02             | -0.05      | 0.04     | 0.06       | -0.08    | -0.26      |
|                    | <i>Massilimicrobiota</i>      | -0.11             | -0.22      | -0.02    | -0.06      | 0.03     | -0.25      |
|                    | <i>Negativibacillus</i>       | 0.13              | -0.29      | 0.18     | -0.04      | 0.05     | -0.05      |
|                    | <i>Oscillibacter</i>          | -0.03             | 0.20       | 0.13     | -0.08      | 0.30     | 0.23       |
|                    | <i>Ruminococcus2</i>          | 0.19              | 0.02       | -0.07    | 0.17       | 0.12     | -0.25      |
|                    | <i>Sellimonas</i>             | -0.03             | 0.00       | 0.02     | 0.04       | -0.02    | -0.31      |
|                    |                               | 50s_Male          | 50s_Female | 60s_Male | 60s_Female | 70s_Male | 70s_Female |
|                    |                               | Age group and sex |            |          |            |          |            |

Supplementary Figure S6. The values of ALDEx2 effect size obtained by comparing the glaucoma disease-affected and disease-free Japanese control groups. The comparisons were performed considering age and sex. Negative values of effect size indicate taxa that are more abundant in the disease-affected group than in the control group, and positive values indicate taxa that are less abundant. The values of effect size less than -0.2 are indicated with pink, and the values greater than 0.2 are indicated with light blue.



|                    |                                  |                   |          |          |          |          |          |            |            |            |            |            |            |
|--------------------|----------------------------------|-------------------|----------|----------|----------|----------|----------|------------|------------|------------|------------|------------|------------|
| Taxa (genus level) | <i>Adlercreutzia</i>             | 0.03              | 0.03     | 0.17     | -0.01    | -0.10    | 0.08     | 0.11       | -0.02      | 0.05       | -0.04      | 0.10       | 0.20       |
|                    | <i>Agathobacter</i>              | 0.34              | 0.08     | 0.00     | 0.01     | -0.04    | 0.13     | -0.10      | 0.15       | -0.23      | 0.13       | 0.24       | 0.09       |
|                    | <i>Agathobaculum</i>             | -0.00             | -0.03    | 0.01     | 0.04     | 0.11     | 0.03     | 0.10       | 0.10       | 0.10       | 0.05       | -0.00      | 0.25       |
|                    | <i>Allisonella</i>               | 0.06              | 0.03     | 0.07     | -0.01    | -0.01    | 0.03     | -0.08      | 0.03       | -0.25      | 0.07       | 0.18       | 0.08       |
|                    | <i>Amedibacterium</i>            | -0.24             | -0.04    | 0.09     | 0.01     | 0.06     | -0.06    | 0.08       | -0.00      | -0.16      | -0.02      | 0.02       | 0.02       |
|                    | <i>Anaeromassilibacillus</i>     | 0.06              | -0.07    | -0.04    | 0.04     | -0.01    | 0.01     | -0.16      | -0.12      | -0.09      | -0.08      | -0.24      | -0.00      |
|                    | <i>Anaerotrignum</i>             | -0.05             | 0.08     | -0.03    | -0.03    | 0.06     | 0.01     | 0.10       | -0.14      | 0.32       | -0.08      | -0.16      | -0.13      |
|                    | <i>Bacteroides</i>               | 0.09              | -0.11    | -0.13    | -0.01    | 0.02     | 0.05     | -0.21      | -0.10      | -0.10      | -0.29      | 0.15       | -0.07      |
|                    | <i>Bifidobacterium</i>           | -0.11             | -0.13    | 0.04     | 0.16     | -0.08    | -0.01    | -0.34      | 0.10       | -0.06      | -0.26      | 0.21       | -0.03      |
|                    | <i>Butyrivibrio</i>              | -0.12             | -0.07    | -0.06    | 0.06     | 0.02     | 0.07     | 0.05       | -0.07      | 0.07       | 0.31       | -0.16      | 0.03       |
|                    | <i>Clostridium_sensu_stricto</i> | 0.19              | -0.19    | -0.04    | -0.01    | 0.04     | 0.06     | 0.02       | -0.14      | -0.23      | -0.10      | 0.20       | -0.07      |
|                    | <i>Clostridium_XIVa</i>          | 0.12              | -0.06    | -0.16    | -0.17    | 0.02     | -0.10    | -0.26      | -0.15      | 0.15       | -0.23      | -0.05      | 0.03       |
|                    | <i>Clostridium_XVIII</i>         | -0.03             | -0.01    | -0.06    | -0.09    | 0.11     | -0.01    | 0.14       | 0.04       | 0.00       | 0.02       | 0.22       | -0.12      |
|                    | <i>Collinsella</i>               | 0.14              | -0.02    | 0.12     | 0.06     | -0.07    | 0.04     | -0.15      | 0.08       | -0.05      | -0.03      | 0.23       | 0.08       |
|                    | <i>Coprobacter</i>               | -0.16             | 0.31     | -0.14    | 0.01     | 0.06     | 0.03     | 0.15       | -0.04      | 0.13       | -0.02      | 0.12       | 0.10       |
|                    | <i>Coprococcus</i>               | 0.02              | 0.06     | 0.08     | -0.07    | -0.05    | 0.10     | 0.06       | 0.09       | 0.17       | -0.00      | 0.11       | 0.30       |
|                    | <i>Dialister</i>                 | 0.17              | 0.21     | 0.00     | 0.07     | 0.04     | -0.00    | 0.05       | 0.05       | 0.25       | 0.15       | -0.13      | 0.22       |
|                    | <i>Dysosmabacter</i>             | 0.02              | 0.01     | -0.06    | -0.02    | 0.01     | 0.01     | -0.29      | -0.08      | 0.15       | -0.16      | -0.33      | -0.09      |
|                    | <i>Eggerthella</i>               | 0.23              | -0.10    | -0.15    | -0.08    | 0.05     | -0.09    | -0.29      | -0.09      | -0.01      | -0.15      | 0.16       | -0.11      |
|                    | <i>Eisenbergiella</i>            | 0.06              | -0.01    | -0.08    | -0.03    | 0.05     | -0.05    | -0.00      | -0.06      | 0.10       | -0.22      | 0.02       | -0.07      |
|                    | <i>Enterocloster</i>             | 0.15              | -0.08    | -0.06    | -0.16    | -0.05    | -0.07    | -0.25      | -0.18      | 0.04       | -0.23      | -0.27      | -0.15      |
|                    | <i>Enterococcus</i>              | -0.02             | -0.02    | -0.08    | -0.04    | 0.02     | -0.02    | -0.05      | -0.09      | -0.01      | -0.16      | -0.25      | 0.05       |
|                    | <i>Erysipelatoclostridium</i>    | 0.01              | -0.11    | 0.01     | -0.20    | 0.02     | -0.13    | -0.16      | -0.14      | 0.09       | -0.17      | 0.10       | -0.37      |
|                    | <i>Eubacterium</i>               | -0.03             | -0.07    | -0.01    | -0.03    | -0.01    | -0.04    | 0.02       | -0.05      | -0.08      | -0.06      | -0.12      | -0.22      |
|                    | <i>Faecalibacillus</i>           | -0.08             | 0.01     | -0.09    | -0.02    | 0.13     | 0.05     | 0.09       | 0.10       | 0.28       | 0.06       | 0.29       | 0.50       |
|                    | <i>Flavonifractor</i>            | 0.02              | -0.06    | -0.11    | -0.08    | 0.02     | -0.04    | -0.37      | -0.16      | -0.03      | -0.09      | -0.42      | -0.13      |
|                    | <i>Fusobacterium</i>             | -0.08             | 0.02     | -0.11    | -0.03    | 0.06     | -0.06    | 0.02       | -0.07      | 0.25       | 0.04       | 0.11       | -0.11      |
|                    | <i>Holdemanella</i>              | -0.12             | 0.01     | 0.08     | -0.01    | 0.05     | 0.04     | 0.16       | 0.03       | 0.20       | -0.05      | 0.22       | 0.11       |
|                    | <i>Intestinibacter</i>           | -0.03             | -0.16    | -0.07    | -0.10    | 0.14     | -0.08    | -0.38      | -0.06      | 0.02       | -0.01      | 0.14       | 0.18       |
|                    | <i>Intestinimonas</i>            | 0.27              | 0.10     | -0.03    | 0.01     | 0.02     | 0.01     | 0.13       | -0.02      | 0.19       | 0.13       | 0.09       | 0.03       |
|                    | <i>Lachnospira</i>               | -0.04             | -0.03    | 0.06     | 0.00     | 0.08     | 0.03     | 0.14       | 0.03       | -0.22      | 0.10       | 0.23       | 0.12       |
|                    | <i>Lactobacillus</i>             | 0.06              | 0.01     | -0.06    | -0.02    | -0.00    | -0.03    | 0.10       | 0.01       | -0.00      | -0.08      | -0.34      | -0.04      |
|                    | <i>Lawsonibacter</i>             | -0.04             | 0.04     | 0.15     | 0.00     | 0.07     | 0.03     | 0.00       | -0.04      | 0.00       | 0.17       | -0.42      | -0.08      |
|                    | <i>Ligilactobacillus</i>         | -0.10             | -0.05    | -0.00    | -0.01    | -0.03    | -0.03    | -0.03      | -0.03      | -0.11      | -0.00      | -0.38      | -0.01      |
|                    | <i>Limosilactobacillus</i>       | -0.12             | 0.04     | 0.02     | -0.00    | -0.01    | -0.02    | 0.03       | -0.00      | -0.03      | 0.09       | -0.46      | -0.25      |
|                    | <i>Mediterraneibacter</i>        | 0.07              | -0.07    | -0.01    | -0.04    | -0.03    | -0.01    | 0.35       | 0.03       | -0.24      | 0.09       | 0.28       | 0.28       |
|                    | <i>Megamonas</i>                 | -0.19             | 0.01     | 0.04     | 0.00     | -0.04    | 0.06     | 0.06       | 0.08       | -0.25      | 0.01       | -0.16      | 0.08       |
|                    | <i>Megasphaera</i>               | 0.14              | -0.10    | -0.00    | 0.05     | -0.07    | -0.05    | -0.23      | 0.01       | -0.25      | -0.08      | -0.09      | -0.10      |
|                    | <i>Merdimonas</i>                | 0.11              | -0.17    | -0.10    | 0.04     | -0.04    | -0.04    | 0.08       | -0.10      | -0.04      | -0.16      | -0.22      | 0.07       |
|                    | <i>Negativibacillus</i>          | 0.06              | 0.02     | -0.06    | 0.01     | -0.02    | 0.03     | 0.23       | -0.07      | 0.38       | -0.16      | -0.18      | -0.22      |
|                    | <i>Odoribacter</i>               | -0.02             | 0.12     | -0.17    | -0.02    | -0.01    | 0.03     | 0.04       | -0.06      | 0.24       | 0.01       | -0.04      | 0.34       |
|                    | <i>Oscillibacter</i>             | 0.08              | 0.08     | 0.10     | 0.11     | -0.07    | 0.08     | 0.24       | 0.07       | 0.11       | 0.04       | -0.04      | 0.09       |
|                    | <i>Paraprevotella</i>            | 0.03              | 0.03     | 0.02     | 0.02     | 0.01     | -0.00    | 0.10       | 0.07       | 0.02       | 0.24       | -0.07      | -0.34      |
|                    | <i>Phascolarctobacterium</i>     | -0.05             | -0.21    | 0.01     | 0.03     | 0.06     | 0.05     | 0.08       | -0.05      | -0.09      | -0.14      | 0.03       | -0.40      |
|                    | <i>Romboutsia</i>                | 0.16              | -0.05    | -0.04    | 0.06     | 0.19     | 0.02     | -0.05      | 0.12       | -0.43      | -0.13      | 0.14       | -0.03      |
|                    | <i>Roseburia</i>                 | -0.15             | 0.03     | 0.01     | 0.08     | 0.06     | 0.03     | 0.08       | 0.20       | -0.17      | 0.25       | 0.27       | -0.15      |
|                    | <i>Ruminococcus</i>              | 0.13              | 0.08     | 0.03     | 0.06     | 0.11     | -0.03    | 0.26       | -0.01      | 0.19       | 0.08       | 0.08       | 0.00       |
|                    | <i>Ruminococcus2</i>             | -0.08             | 0.04     | -0.08    | -0.01    | 0.14     | -0.01    | -0.18      | -0.10      | -0.06      | -0.03      | -0.32      | 0.33       |
|                    | <i>Ruthenibacterium</i>          | 0.02              | -0.11    | -0.11    | -0.02    | -0.13    | -0.04    | -0.19      | -0.20      | 0.01       | -0.22      | -0.21      | -0.05      |
|                    | <i>Sellimonas</i>                | 0.05              | -0.01    | -0.00    | 0.06     | -0.01    | -0.09    | -0.20      | -0.09      | 0.10       | -0.17      | -0.00      | -0.09      |
|                    | <i>Senegalimassilia</i>          | 0.08              | -0.02    | -0.02    | -0.00    | -0.03    | 0.02     | -0.13      | 0.05       | 0.02       | -0.02      | 0.20       | 0.04       |
|                    | <i>Slackia</i>                   | -0.08             | 0.06     | 0.07     | -0.01    | -0.06    | 0.05     | 0.20       | 0.02       | 0.23       | -0.03      | 0.14       | -0.02      |
|                    | <i>Streptococcus</i>             | -0.05             | -0.07    | -0.06    | -0.04    | -0.10    | -0.04    | -0.20      | 0.10       | 0.04       | -0.02      | -0.36      | -0.12      |
|                    | <i>Sutterella</i>                | -0.10             | -0.07    | 0.05     | 0.05     | 0.09     | 0.02     | 0.05       | 0.13       | 0.14       | -0.01      | 0.56       | -0.11      |
|                    | <i>Turicibacter</i>              | -0.02             | -0.09    | -0.05    | 0.09     | 0.09     | 0.10     | 0.03       | 0.09       | -0.01      | 0.08       | 0.29       | -0.16      |
|                    | <i>Veillonella</i>               | -0.17             | -0.13    | -0.02    | 0.05     | 0.07     | -0.01    | -0.03      | -0.06      | -0.32      | 0.02       | -0.21      | -0.02      |
|                    | <i>Victivallis</i>               | -0.01             | 0.02     | 0.07     | 0.03     | -0.13    | 0.03     | 0.09       | -0.06      | 0.09       | -0.08      | -0.29      | 0.13       |
|                    |                                  | 20s_Male          | 30s_Male | 40s_Male | 50s_Male | 60s_Male | 70s_Male | 20s_Female | 30s_Female | 40s_Female | 50s_Female | 60s_Female | 70s_Female |
|                    |                                  | Age group and sex |          |          |          |          |          |            |            |            |            |            |            |

Supplementary Figure S7. The values of ALDEx2 effect size obtained by comparing the atopic dermatitis disease-affected and disease-free Japanese control groups. The comparisons were performed considering age and sex. Negative values of effect size indicate taxa that are more abundant in the disease-affected group than in the control group, and positive values indicate taxa that are less abundant. The values of effect size less than -0.2 are indicated with pink, and the values greater than 0.2 are indicated with light blue.
